# Supplementary material for: Socioeconomic Inequality in One-Year Mortality of Elderly People with Hip Fracture in Taiwan
Source: Int J Environ Res Public Health. 2018 Feb 16;15(2):352. doi: 10.3390/ijerph15020352 (PMC5858421; doi:10.3390/ijerph15020352)
Supplement: Supplementary file 1 [file ijerph-15-00352-s001.docx]

**Supplemental Figure S1.** Odds ratios of one-year mortality in relation to deciles of median family annual income.

| 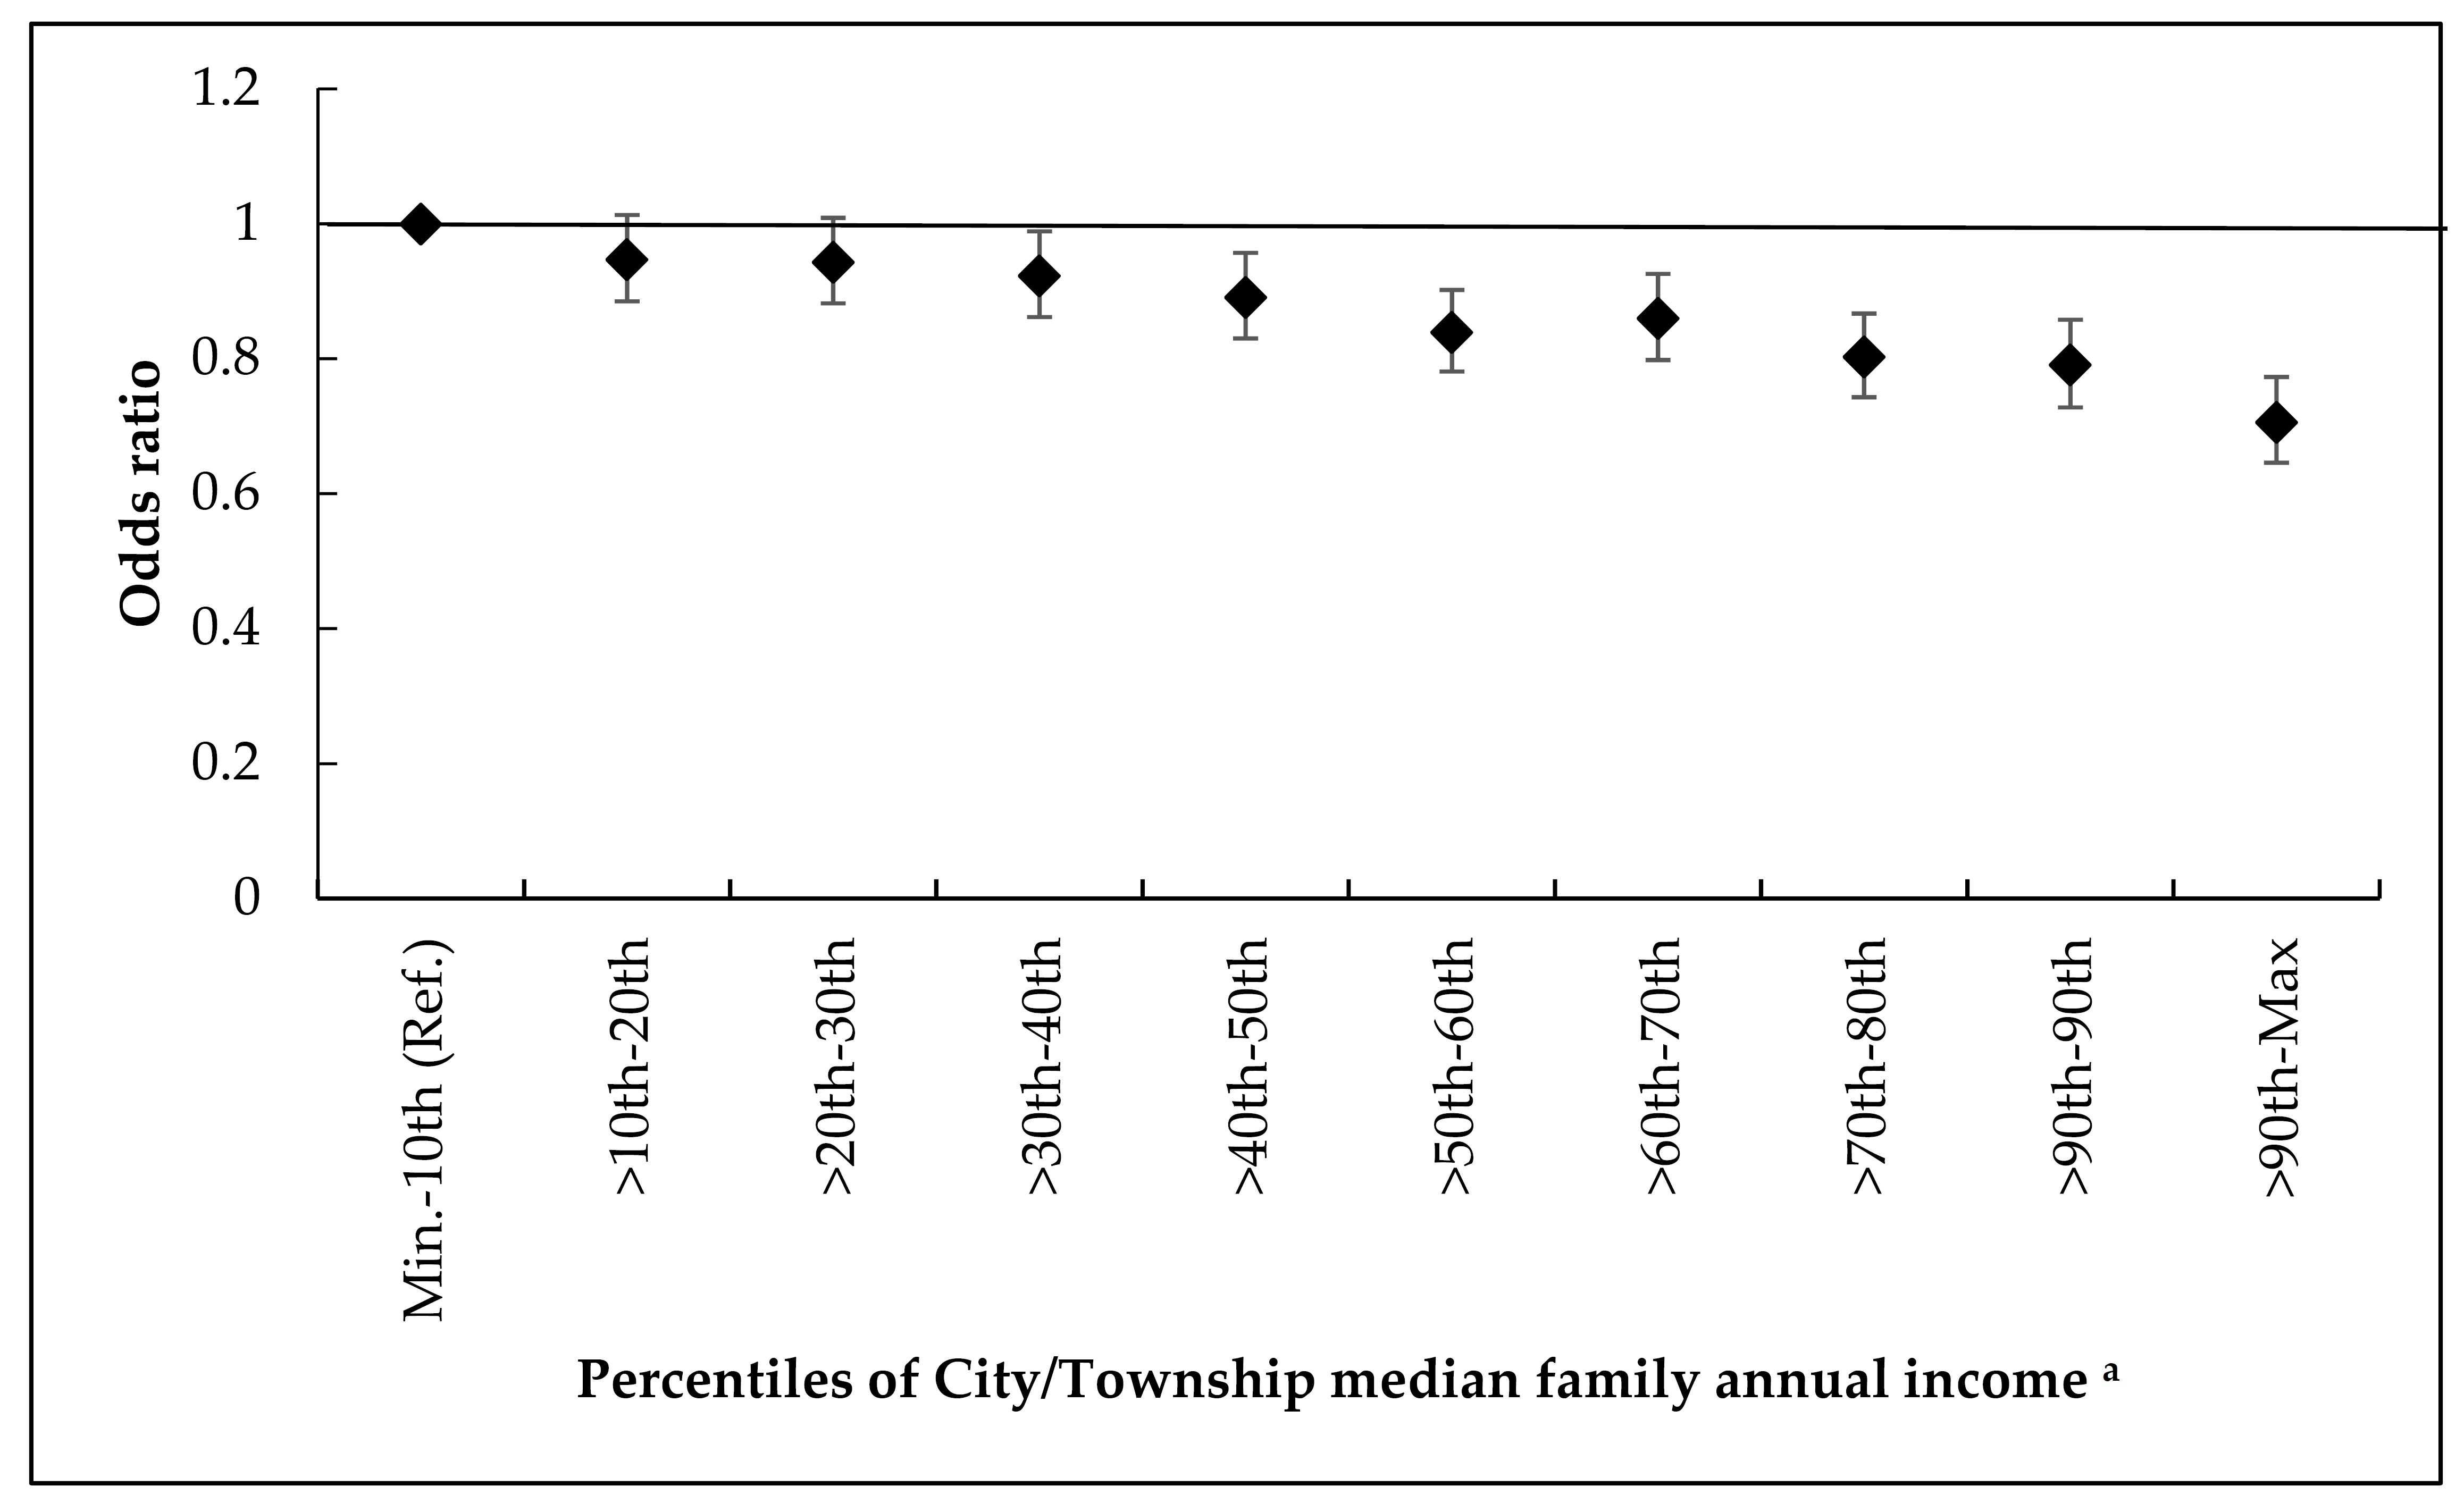  a The 10th, 20th, 30th, 40th, 50th, 60th, 70th, 80th, and 90th percentile was 15,400, 16,133, 16,733, 17,433, 18,100, 18,766, 19,700, 20,866, and 23,200 US dollars, respectively. |
| --- |
